# Supplementary material
Source: publisher site journal article supplement (https://www.dovepress.com/get_supplementary_file.php?f=431126.docx)
Supplement: Supplementary file 1 [file get_supplementary_file.php]

Supplementary table 1: Risk factors associated with persistent viral shedding more than one week in Omicron infection patients with cancer.

| Variable | Univariate | |
| --- | --- | --- |
| OR (95% CI) | P value |
| Age (years) |  |  |
| < 60 | Reference | — |
| ≥ 60 | 4.59 (2.16-10.15) | < 0.001 |
| Sex |  |  |
| Male | Reference | — |
| Female | 1.14 (0.55-2.35) | 0.722 |
| Hypertension |  |  |
| No | Reference | — |
| Yes | 1.57 (0.65-4.11) | 0.331 |
| Diabetes mellitus |  |  |
| No | Reference | — |
| Yes | 3.13 (0.78-20.94) | 0.153 |
| Other chronic disease |  |  |
| No | Reference | — |
| Yes | 0.70 (0.18-2.95) | 0.606 |
| Vaccination |  |  |
| No | Reference | — |
| Yes | 0.83 (0.40-1.73) | 0.623 |
| Symptoms |  |  |
| No | Reference | — |
| Yes | 0.83 (0.38-1.84) | 0.643 |
| OR, odd ratio; CI, confidence interval. | | |
